# Supplementary material for: Effect of third- and fourth-line systemic therapies for metastatic renal cell carcinoma
Source: PubMed Central journal article supplement (PMC6820538; doi:10.1038/s41598-019-51305-7), 2019-10-29
Supplement: 41598_2019_51305_MOESM1_ESM.pdf [file 41598_2019_51305_MOESM1_ESM.pdf]

**Effect of third- and fourth-line systemic therapies for metastatic renal cell carcinoma**

Sei Naito<sup>\*</sup>, Osamu Ichiiyanagi, Tomoyuki Kato, Hidenori Kanno, Takafumi Narisawa, Masayuki Kurokawa, Masaki Ushijima, Michinobu Ozawa, Mayu Yagi, Yuta Kurota, Hiroki Fukuhara, Atsushi Yamagishi,  
Toshihiko Sakurai, Hayato Nishida, Hisashi Kawazoe, Takuya Yamanobe, and Norihiko Tsuchiya.

Department of Urology, Yamagata University Faculty of Medicine, Iida-nishi 2-2-2, Yamagata, 990-9585, Japan.

Tel: +81-23-628-5368; Fax: +81-23-628-5370

\*Corresponding author: e-mail: [seinaitoh@ybb.ne.jp](mailto:seinaitoh@ybb.ne.jp)

**Running title:** 3rd- and 4th-line therapies for mRCC



Supplementary Table 2. Duration and PFS each drug type each line

|           | 1st line |                    |                       | 2nd line |                      |                      | 3rd line |                    |                       | 4th line |                    |                      | 5th line |                    |                     | 6th line |                    | 7th line            |   | 8th line      |           |   |               |           |
|-----------|----------|--------------------|-----------------------|----------|----------------------|----------------------|----------|--------------------|-----------------------|----------|--------------------|----------------------|----------|--------------------|---------------------|----------|--------------------|---------------------|---|---------------|-----------|---|---------------|-----------|
|           | N        | DURATIO<br>N*      | PFS<br>**             | N        | DURATIO<br>N*        | PFS<br>**            | N        | DURATIO<br>N*      | PFS<br>**             | N        | DURATIO<br>N*      | PFS<br>**            | N        | DURATIO<br>N*      | PFS<br>**           | N        | DURATIO<br>N*      | PFS<br>**           | N | DURATIO<br>N* | PFS<br>** |   |               |           |
| αVE<br>GF | 12<br>6  | 4.5 (0.1-<br>43.5) | 6.2<br>(4.1-<br>8.8)  | 7<br>6   | 2.2 (0.1-<br>75.8)   | 2.5<br>(1.0-<br>5.7) | 2<br>4   | 2.9 (0.2-<br>49.8) | 4.1<br>(2.2-<br>18.9) | 1<br>4   | 2.4 (0.9-<br>9.2)  | 3.7<br>(1.4-<br>7.6) | 5        | 2.1 (1.1-<br>6.2)  | 3.4<br>(1.8-<br>NA) | 5        | 4.6 (0.6-<br>18.6) | 4.6<br>(0.6-<br>NA) | 1 | 2.1           | 2.1       | 1 | 3.0           | 3.0       |
| mTO<br>RI | 9        | 1.1 (0.1-<br>4.2)  | 1.4<br>(0.1-<br>2.1)  | 1<br>2   | 1.9 (0.2-<br>54.3)   | 3.5<br>(1.0-<br>NA)) | 1<br>5   | 1.8 (0.4-<br>23.9) | 2.0<br>(0.8-<br>4.2)  | 7        | 5.4 (0.7-<br>15.0) | 5.4<br>(0.7-<br>NA)  | 3        | 1.6 (1.6-<br>6.7)  | 1.6<br>(1.6-<br>NA) | 0        |                    |                     | 0 |               |           | 0 |               |           |
| IoT       | 1        | 5.5                | NA                    | 2        | 1.84                 | NA                   | 9        | 3.1 (0.7-<br>8.7)  | 3.7<br>(0.7-<br>5.5)  | 2        | 4.0 (3.4-<br>4.7)  | 4.0<br>(3.4-<br>NA)  | 4        | 4.3 (0.2-<br>11.7) | 0.7<br>(0.2-<br>NA) | 0        |                    |                     | 1 | 7.4           | 7.4       | 0 |               |           |
| other     | 7        | 2.5 (1.6-<br>26.2) | 2.5<br>(1.6-<br>19.5) | 5        | 71.2 (2.5-<br>140.1) | 2.5<br>(2.5-<br>NA)  | 4        | 2.4 (1.1-<br>2.6)  | 2.4<br>(1.1-<br>NA)   | 3        | 2.3 (0.5-<br>5.1)  | 5.1<br>(0.5-<br>NA)  | 3        | 1.2 (0.8-<br>3.6)  | 1.3<br>(0.9-<br>NA) | 0        |                    |                     | 1 | 0.4           | 0.4       | 0 |               |           |
|           | 1st line |                    |                       | 2nd line |                      |                      | 3rd line |                    |                       | 4th line |                    |                      | 5th line |                    |                     | 6th line |                    | 7th line            |   | 8th line      |           |   |               |           |
|           | N        | DURATIO<br>N*      | PFS<br>**             | N        | DURATIO<br>N*        | PFS<br>**            | N        | DURATIO<br>N*      | PFS<br>**             | N        | DURATIO<br>N*      | PFS<br>**            | N        | DURATIO<br>N*      | PFS<br>**           | N        | DURATIO<br>N*      | PFS<br>**           | N | DURATIO<br>N* | PFS<br>** | N | DURATIO<br>N* | PFS<br>** |
| αVE<br>GF | 93       | 3.2 (0.1-<br>43.5) | 4.7<br>(2.8-<br>8.7)  | 5<br>7   | 1.5 (0.1-<br>15.2)   | 1.8<br>(0.9-<br>2.9) | 1<br>9   | 2.5 (0.2-<br>38.4) | 3.2<br>(1.4-<br>4.8)  | 1<br>1   | 2.4 (0.9-<br>7.8)  | 3.7<br>(0.9-<br>7.6) | 4        | 3.2 (1.1-<br>6.2)  | 4.6<br>(1.8-<br>NA) | 4        | 4.6 (0.6-<br>18.6) | 4.6<br>(0.6-<br>NA) | 1 | 2.1           | 2.1       | 1 | 3.0           | 3.0       |
| mTO<br>RI | 9        | 1.1 (0.1-<br>4.2)  | 1.4<br>(0.1-<br>2.1)  | 1<br>0   | 1.9 (0.2-<br>10.6)   | 1.9<br>(1.0-<br>NA)  | 1<br>3   | 1.3 (0.4-<br>12.4) | 1.3<br>(0.7-<br>3.7)  | 6        | 2.1 (0.7-<br>15.0) | 2.1<br>(0.7-<br>NA)  | 3        | 1.6 (1.6-<br>6.7)  | 1.6<br>(1.6-<br>NA) | 0        |                    |                     | 0 |               |           | 0 |               |           |
| IoT       | 0        |                    |                       | 0        |                      |                      | 5        | 1.8 (0.7-<br>5.5)  | 3.7<br>(0.7-<br>NA)   | 1        | 3.4                | 3.4                  | 1        | 0.2                | 0.2                 | 0        |                    |                     | 0 |               |           | 0 |               |           |
| other     | 5        | 2.5 (1.6-<br>19.5) | 2.5<br>(1.6-<br>NA)   | 4        | 2.5                  | 2.5<br>(NA-<br>NA)   | 3        | 2.5 (2.5-<br>2.6)  | 2.5<br>(2.5-<br>NA)   | 2        | 2.8 (0.5-<br>5.1)  | 2.8<br>(0.5-<br>NA)  | 2        | 2.3 (0.9-<br>3.6)  | 2.3<br>(0.9-<br>NA) | 0        |                    |                     | 1 | 0.4           | 0.4       | 0 |               |           |

\*DURATION; duration from start of treatment to date of progression or last follow-up, \*\*PFS; progression free survival

Supplementary Table 3. Sequence until third-line therapy

| sequence                                    | N  | %    |
|---------------------------------------------|----|------|
| $\alpha$ VEGF/ $\alpha$ VEGF/ $\alpha$ VEGF | 17 | 32.7 |
| $\alpha$ VEGF/ $\alpha$ VEGF/mTORI          | 12 | 23.1 |
| $\alpha$ VEGF/ $\alpha$ VEGF/IoT            | 9  | 17.3 |
| $\alpha$ VEGF/ $\alpha$ VEGF/other          | 3  | 5.8  |
| $\alpha$ VEGF/mTORI/ $\alpha$ VEGF          | 1  | 1.9  |
| $\alpha$ VEGF/mTORI/mTORI                   | 1  | 1.9  |
| $\alpha$ VEGF/mTORI/other                   | 1  | 1.9  |
| mTORI/ $\alpha$ VEGF/ $\alpha$ VEGF         | 1  | 1.9  |
| other/ $\alpha$ VEGF/ $\alpha$ VEGF         | 2  | 3.8  |
| other sequence                              | 5  | 9.6  |
